# Supplementary material
Source: PubMed Central journal article supplement (PMC3520619)

## Supplemental Methods

### Antibodies and Reagents

Cells were stained with antibodies against Bcl-xL (7B2.5, abcam), Bim (AbD Serotec), and CD122 (TM- $\beta$ 1, Biolegend) where indicated.

### IL-2 Treatment

Animals receiving IL-2 support were injected i.p. with 9000 IU (Chiron) every other day for 7 days.

### Quantitative RT-PCR

Spleens and lymph nodes were removed and homogenized to produce a single cell suspension. Cells were incubated with Thy1.2 beads (Miltenyi) to distinguish adoptively transferred FH T cells and positively sorted using an AutoMACS pro. Total cellular RNA was isolated using TRIZOL (Invitrogen) per manufacturer's instructions. Contaminating genomic DNA was removed by treatment with RNase-free DNase I, and cDNA was prepared using the SuperScript III First-Strand Synthesis System (Invitrogen). Quantitative real time PCR was performed on cDNA with Titanium *Taq* Polymerase (BD Clontech) with 1X SYBR Green (Molecular Probes) and 0.4  $\mu$ M of the primer set of interest in 25- $\mu$ l reaction mixtures in a MyiQ Single Color Real-Time PCR Detection System (Bio-Rad). Conditions for quantitative RT-PCR were as follows: 95°C for 3 minutes, then 40 cycles of 95°C for 40 seconds, 66°C for 20 seconds, and 72°C for 30 seconds, followed by an extension at 72°C for 1 minute. Melting curve analysis was then performed to ensure equivalent and appropriate melting temperatures. Each sample was normalized relative to the expression of *HPRT* (encoding hypoxanthine guanine phosphoribosyltransferase). Primers used were as follows: *Bid* (forward, 5'-CACAACATCCAGCCCACACT-3'; reverse, 5'-CTCCATGTCTCTGGGAAGG-3'), *Bad* (forward, 5'-GCGATGAGTTTGAGGGTTCC-3'; reverse, 5'-TCCTTTGCCCAAGTTTCGAT-3'), *Bmf* (forward, 5'-GAGGTGCAGATCGCCAGAAA-3'; reverse, 5'-TG TTCAGGGCGAGGTTTTGA-3'), *Bim(EL)* (forward, 5'-GCCCTGGCCCTTTTGC-3'; reverse,

5'-CCGGGACAGCAGAGAAGATC-3'), *Bim(L)* (forward, 5'-GACAGAACCGCAAGACAGGAG-3'; reverse, 5'-TGGCAAGGAGGACTTGGG-3') and *HPRT* (forward, 5'-TGCCGAGGATTTGGAAAAAGTG-3'; reverse, 5'-CACAGAGGGCCACAATGTGATG-3').

### **Statistical Analysis**

*P* values on paired samples were calculated by unpaired *t*-tests. Two-way analysis of variance statistical analysis with Bonferonni post-tests was used when multiple groups of samples were compared. Statistics were calculated using GraphPad Prism version 5.0 (GraphPad, La Jolla, CA, USA).

**Supplemental Figure 1. PD-L1:PD-1 engagement inhibits the expression of the anti-apoptotic molecule Bcl-xL and increases the expression of pro-apoptotic molecules in deleting FH cells.** FH cells were transferred into tyrosinase<sup>+</sup> mice left untreated or treated with blocking anti-PD-L1 or anti-4-1BB+OX40. LN were harvested 3 days post-transfer and FH cells were examined for **(A)** expression of the anti-apoptotic molecule Bcl-xL and pro-apoptotic molecule Bim by MFI or **(B)** expression of mRNA of the pro-apoptotic molecules Bim (EL), Bim (L), Bid, Bad, and Bmf by qRT-PCR. **(A)** Relative expression was calculated by dividing the MFI from each treatment by the MFI of FH cells from control albino mice. Data is representative of 3 mice for each condition from 3 independent experiments for Bcl-xL and 5, 4, and 4 mice left untreated, treated with blocking anti-PD-L1, or with agonist anti-4-1BB+OX40, respectively, from 4 to 5 independent experiments for Bim. **(B)** Data is representative of 2 mice for each condition from one experiment with each sample run in duplicate.

**Supplemental Figure 2. Exogenous IL-2 administration does not rescue FH cells, which express high levels of CD122, from deletion.** **(A)** Representative data of FH cells transferred into tyrosinase<sup>+</sup> mice, tyrosinase<sup>+</sup> mice administered exogenous IL-2, or antigen free albino mice. LN were harvested 7 days post-adoptive transfer. Boxes represent the percent of T<sub>CD8</sub> that are FH cells in the LN of recipient mice. **(B)** Cumulative data from tyrosinase<sup>+</sup> mice, tyrosinase<sup>+</sup> mice administered exogenous IL-2, or antigen free albino mice. Data represent 3 mice per condition from 2 independent experiments. \*\*P = .0074 (two-tailed, unpaired *t*-test). **(C)** Data represent the % of FH cells that have undergone the indicated number of divisions that express CD122 3 days post-transfer. Data represents 2 to 3 mice per conditions from 2 to 3 independent experiments utilizing untreated tyrosinase<sup>+</sup> mice (●), tyrosinase<sup>+</sup> mice treated with blocking anti-PD-L1 (■), or tyrosinase<sup>+</sup> mice treated with agonist anti-4-1BB+OX40 (▲). Differences in CD122 expression were not significant. (Two-way ANOVA, Bonferonni post-test). (error bars **(B, C)**, s.e.m.)#

Supplemental Figure 1

**A**

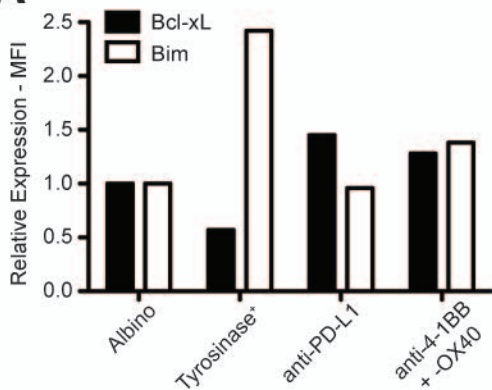

**B**

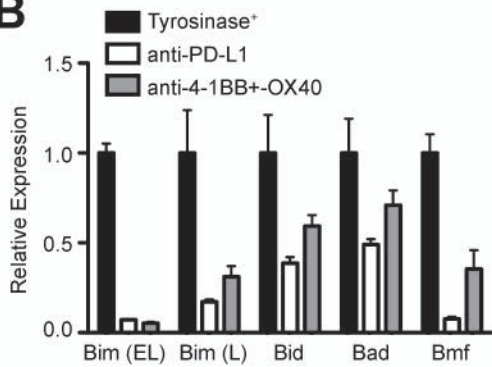

Supplemental Figure 2

**A**

Thy1.2

Untreated

+ IL-2

Albino

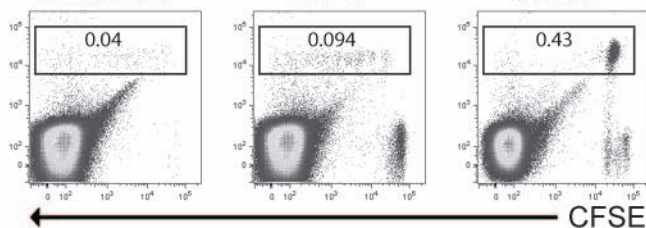

**B**

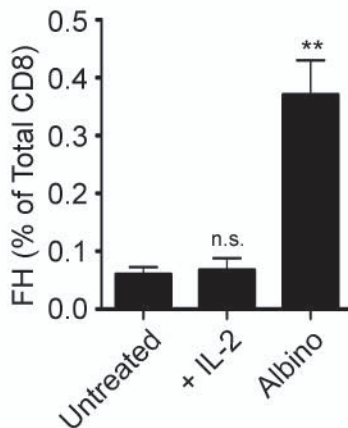

**C**

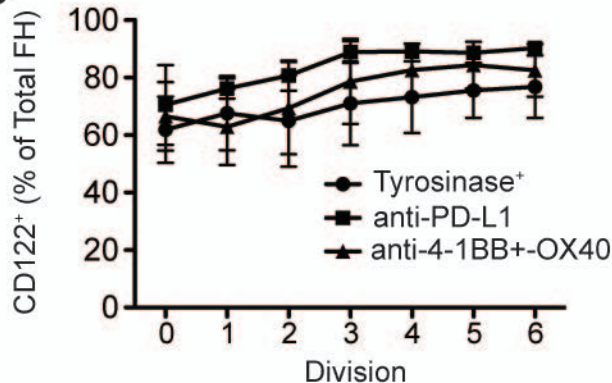

Supplement: supp_blood-2012-04-427013_blood-2012-04-427013-1.pdf [file supp_blood-2012-04-427013_blood-2012-04-427013-1.pdf]
